# Supplementary material for: Three 3D LnIII-MOFs based on a nitro-functionalized biphenyltricarboxylate ligand: syntheses, structures, and magnetic properties
Source: Royal Society of Chemistry journal article supplement (doi:10.1039/c9ce01245a), 2019-11-23
Supplement: c9ce01245a1.pdf [file c9ce01245a1.pdf]

## Three 3D Ln<sup>III</sup>-MOFs based on a nitro-functionalized biphenyltricarboxylate Ligand: syntheses, structures, and magnetic properties

Wei Gao, Hong Huang, Ai-Mei Zhou, Han Wei, Jie-Ping Liu and Xiu-Mei Zhang\*

†College of Chemistry and Materials Science, Huaibei Normal University, Anhui 235000, China

**Table S1** Selected bond lengths [Å] and angles [°] for **1**.

| MOF 1        |            |              |            |
|--------------|------------|--------------|------------|
| Pr1-O2A      | 2.373(4)   | Pr1-O1       | 2.381(4)   |
| Pr1-O4B      | 2.423(4)   | Pr1-O20      | 2.497(4)   |
| Pr1-O12C     | 2.529(4)   | Pr1-O9       | 2.541(4)   |
| Pr1-O19      | 2.576(5)   | Pr1-O10      | 2.684(4)   |
| Pr1-O11C     | 2.698(4)   | Pr2-O14D     | 2.347(4)   |
| Pr2-O17      | 2.475(5)   | Pr2-O10      | 2.483(3)   |
| Pr2-O11C     | 2.483(4)   | Pr2-O3B      | 2.491(4)   |
| Pr2-O5D      | 2.528(4)   | Pr2-O18      | 2.531(5)   |
| Pr2-O6D      | 2.533(4)   |              |            |
| O2A-Pr1-O4B  | 161.86(15) | O2A-Pr1-O1   | 96.01(15)  |
| O1-Pr1-O4B   | 78.33(14)  | O2A-Pr1-O20  | 89.10(19)  |
| O1-Pr1-O20   | 138.8(2)   | O4B-Pr1-O20  | 84.29(19)  |
| O2A-Pr1-O12C | 75.19(14)  | O1-Pr1-O12C  | 146.64(16) |
| O4B-Pr1-O12C | 118.73(13) | O20-Pr1-O12C | 74.1(2)    |
| O2A-Pr1-O9   | 75.66(15)  | O1-Pr1-O9    | 70.43(15)  |
| O4B-Pr1-O9   | 117.49(12) | O20-Pr1-O9   | 149.2(2)   |

|               |            |               |            |
|---------------|------------|---------------|------------|
| O12C-Pr1-O9   | 76.21(15)  | O2A-Pr1-O19   | 72.36(18)  |
| O1-Pr1-O19    | 72.57(16)  | O4B-Pr1-O19   | 89.51(16)  |
| O20-Pr1-O19   | 70.21(18)  | O12C-Pr1-O19  | 131.34(17) |
| O9-Pr1-O19    | 127.31(15) | O2A-Pr1-O10   | 125.25(15) |
| O1-Pr1-O10    | 70.47(13)  | O4B-Pr1-O10   | 69.44(12)  |
| O20-Pr1-O10   | 136.14(15) | O12C-Pr1-O10  | 88.23(14)  |
| O9-Pr1-O10    | 49.64(11)  | O19-Pr1-O10   | 140.32(15) |
| O2A-Pr1-O11C  | 123.96(13) | O1-Pr1-O11C   | 132.83(12) |
| O4B-Pr1-O11C  | 69.79(12)  | O20-Pr1-O11C  | 71.99(16)  |
| O12C-Pr1-O11C | 49.14(12)  | O9-Pr1-O11C   | 94.33(13)  |
| O19-Pr1-O11C  | 138.32(14) | O10-Pr1-O11C  | 66.27(11)  |
| O14D-Pr2-O17  | 86.1(2)    | O14D-Pr2-O10  | 93.63(14)  |
| O17-Pr2-O10   | 141.95(17) | O14D-Pr2-O11C | 154.52(13) |
| O17-Pr2-O11C  | 91.83(18)  | O10-Pr2-O11C  | 72.65(12)  |
| O14D-Pr2-O3B  | 83.92(15)  | O17-Pr2-O3B   | 142.60(18) |
| O10-Pr2-O3B   | 74.75(13)  | O11C-Pr2-O3B  | 111.77(13) |
| O14D-Pr2-O5D  | 129.25(13) | O17-Pr2-O5D   | 74.8(2)    |
| O10-Pr2-O5D   | 129.68(13) | O11C-Pr2-O5D  | 74.04(13)  |
| O3B-Pr2-O5D   | 84.03(15)  | O14D-Pr2-O18  | 79.40(17)  |
| O17-Pr2-O18   | 70.5(2)    | O10-Pr2-O18   | 72.06(16)  |
| O11C-Pr2-O18  | 75.99(16)  | O3B-Pr2-O18   | 141.55(19) |
| O5D-Pr2-O18   | 132.75(19) | O14D-Pr2-O6D  | 77.97(14)  |
| O17-Pr2-O6D   | 70.53(19)  | O10-Pr2-O6D   | 146.50(15) |
| O11C-Pr2-O6D  | 125.12(13) | O3B-Pr2-O6D   | 72.15(16)  |
| O5D-Pr2-O6D   | 51.42(13)  | O18-Pr2-O6D   | 135.82(17) |

A -x+2,-y+1,-z+3; B -x+2,-y+1,-z+2; C x-y,x-1,-z+3; D x-y,x-1,-z+2.

**Table S2** Selected bond lengths [Å] and angles [°] for **2**.

MOF **2**

|             |            |             |            |
|-------------|------------|-------------|------------|
| Gd1-O5A     | 2.297(3)   | Gd1-O9      | 2.355(3)   |
| Gd1-O1B     | 2.376(3)   | Gd1-O6C     | 2.399(3)   |
| Gd1-O4D     | 2.475(3)   | Gd1-O2      | 2.483(3)   |
| Gd1-O3D     | 2.550(3)   | Gd1-O3E     | 2.604(3)   |
| Gd1-O1      | 2.737(3)   |             |            |
| O5A-Gd1-O9  | 95.00(12)  | O5A-Gd1-O1B | 87.05(12)  |
| O9-Gd1-O1B  | 144.37(9)  | O5A-Gd1-O6C | 77.08(11)  |
| O9-Gd1-O6C  | 142.63(10) | O1B-Gd1-O6C | 72.46(9)   |
| O5A-Gd1-O4D | 143.05(11) | N2-Gd1-O4D  | 79.64(14)  |
| O1B-Gd1-O4D | 77.82(14)  | O6C-Gd1-O4D | 127.82(12) |
| O5A-Gd1-O2  | 70.81(12)  | O9-Gd1-O2   | 79.51(12)  |
| O1B-Gd1-O2  | 139.10(11) | O6C-Gd1-O2  | 69.30(12)  |
| O4D-Gd1-O2  | 138.90(14) | O5A-Gd1-O3D | 158.02(12) |
| O9-Gd1-O3D  | 105.37(10) | O1B-Gd1-O3D | 81.17(9)   |
| O6C-Gd1-O3D | 81.73(9)   | O4D-Gd1-O3D | 51.63(9)   |
| O2-Gd1-O3D  | 106.91(10) | O5A-Gd1-O3E | 69.81(9)   |
| O9-Gd1-O3E  | 79.83(9)   | O1B-Gd1-O3E | 67.52(9)   |
| O6C-Gd1-O3E | 128.47(10) | O4D-Gd1-O3E | 73.27(11)  |
| O2-Gd1-O3E  | 129.58(10) | O3D-Gd1-O3E | 121.23(9)  |
| O5A-Gd1-O1  | 119.71(10) | O9-Gd1-O1   | 67.44(9)   |
| O1B-Gd1-O1  | 140.15(7)  | O6C-Gd1-O1  | 84.73(9)   |
| O4D-Gd1-O1  | 92.11(11)  | O2-Gd1-O1   | 49.07(9)   |
| O3D-Gd1-O1  | 63.18(8)   | O3E-Gd1-O1  | 146.21(8)  |

A -x+2, -y+1, -z+1; B x, -y+3/2, z+1/2; C -x+2, y+1/2, -z-1/2; D -x+1, y+1/2, -z+1/2; E -x+1, y+1/2, -z+1/2.

Table S3 Selected bond lengths [Å] and angles [°] for **3**.

MOF **3**

|         |          |         |          |
|---------|----------|---------|----------|
| Dy1-O4A | 2.288(4) | Dy1-O2B | 2.294(5) |
| Dy1-O1  | 2.316(4) | Dy1-O3C | 2.348(4) |

|             |            |             |            |
|-------------|------------|-------------|------------|
| Dy1-O10     | 2.378(5)   | Dy1-O9      | 2.452(4)   |
| Dy1-O6D     | 2.457(4)   | Dy1-O5D     | 2.486(4)   |
| O4A-Dy1-O2B | 149.54(17) | O4A-Dy1-O1  | 84.18(18)  |
| O2B-Dy1-O1  | 106.54(18) | O4A-Dy1-O3C | 99.47(16)  |
| O2B-Dy1-O3C | 85.65(18)  | O1-Dy1-O3C  | 149.44(18) |
| O4A-Dy1-O10 | 139.43(18) | O2B-Dy1-O10 | 71.01(17)  |
| O1-Dy1-O10  | 78.3(2)    | O3C-Dy1-O10 | 79.58(17)  |
| O4A-Dy1-O9  | 69.10(16)  | O2B-Dy1-O9  | 140.03(17) |
| O1-Dy1-O9   | 79.81(17)  | O3C-Dy1-O9  | 73.43(18)  |
| O10-Dy1-O9  | 71.92(16)  | O4A-Dy1-O6D | 80.42(15)  |
| O2B-Dy1-O6D | 74.43(17)  | O1-Dy1-O6D  | 77.73(16)  |
| O3C-Dy1-O6D | 132.83(15) | O10-Dy1-O6D | 129.62(15) |
| O9-Dy1-O6D  | 143.62(16) | O4A-Dy1-O5D | 74.20(16)  |
| O2B-Dy1-O5D | 76.95(16)  | O1-Dy1-O5D  | 128.08(16) |
| O3C-Dy1-O5D | 81.53(15)  | O10-Dy1-O5D | 143.74(18) |
| O9-Dy1-O5D  | 130.67(15) | O6D-Dy1-O5D | 52.73(13)  |

---

A -x+1,-y-1,-z+1; B -x+1,-y-1,-z; C x,y-1,z-1; D x-1,y-1,z-1.

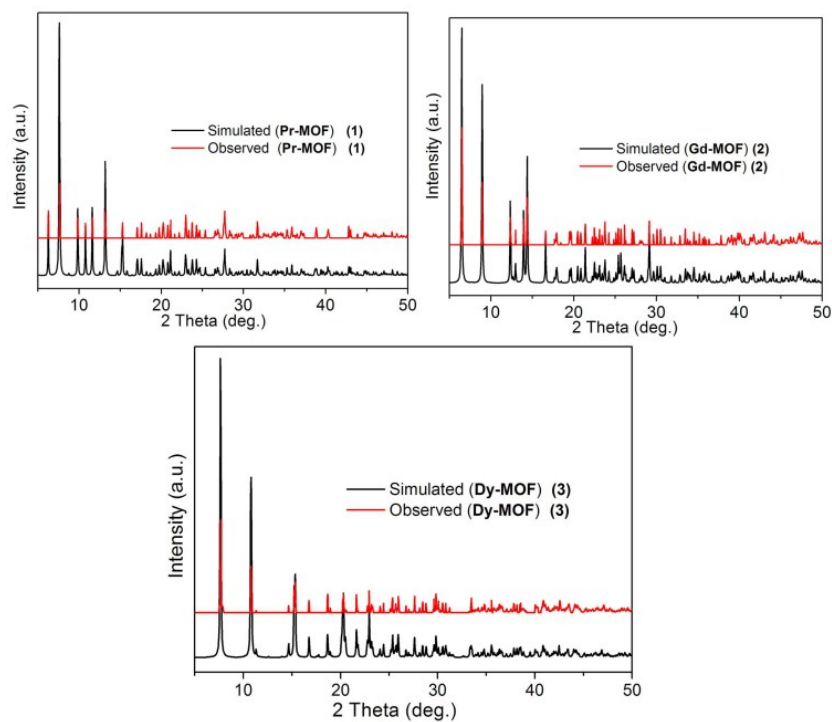

**Fig. S1** Powder X-ray diffraction patterns of **1-3**.

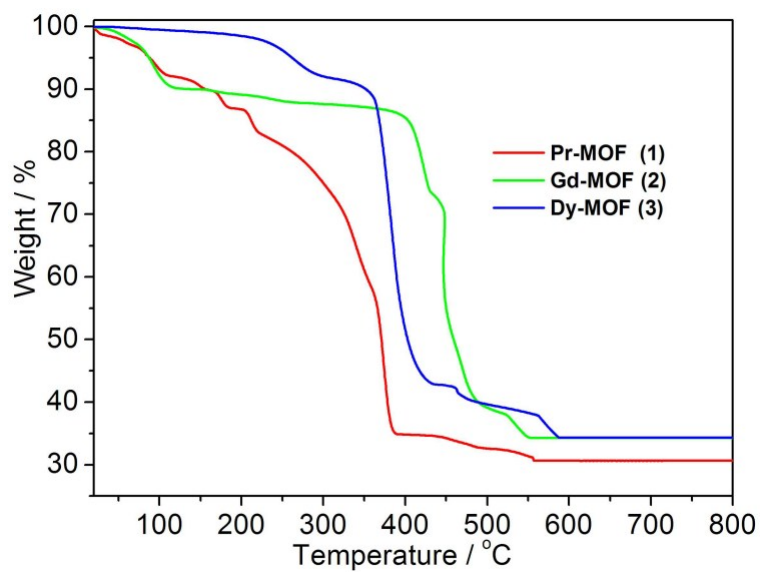

**Fig. S2** TGA curve for **1-3**.

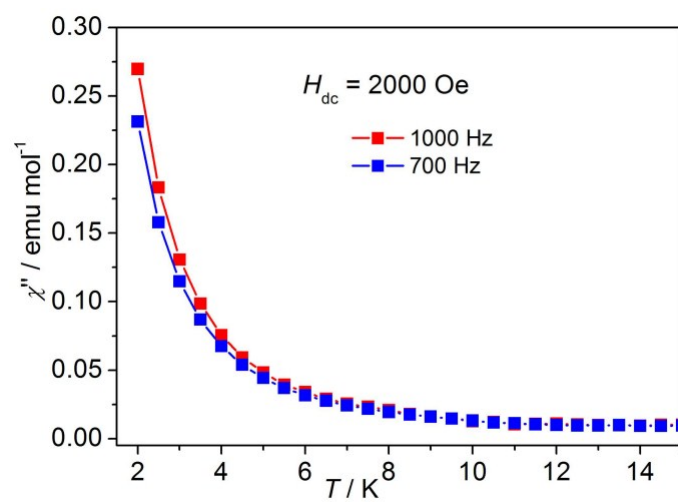

**Fig. S3** Temperature-dependent out-of-phase ( $\chi''$ ) ac susceptibilities for Dy-MOF (**3**) under 2000 Oe dc field.
